# Supplementary material for: A stable amino-functionalized fluorinated metal–organic framework for efficient separation of propyne/propylene
Source: Royal Society of Chemistry journal article supplement (doi:10.1039/d5cc05733g), 2025-12-01
Supplement: d5cc05733g1.pdf [file d5cc05733g1.pdf]

## Supporting Information

### **A stable amino-functionalized fluorinated metal-organic framework for efficient separation of propyne/propylene**

Yun-Tao Huang<sup>a</sup>, Zi-Meng Song<sup>a</sup>, Xin-Ye Zhao<sup>a</sup>, Beibei Li<sup>b</sup>, Zhengyi Di<sup>\*a</sup>, Cheng-Peng Li<sup>\*a</sup>

<sup>a</sup>Academy of Interdisciplinary Studies on Intelligent Molecules, Tianjin Key Laboratory of Structure and Performance for Functional Molecules, College of Chemistry, Tianjin Normal University, Tianjin, 300387 (China)

<sup>b</sup>Henan Key Laboratory of Polyoxometalate, College of Chemistry and Molecular Sciences, Henan University, Kaifeng, Henan 475004, China.

## Materials and Instrumentation

The reagents and solvents used in the study were purchased commercially without further purification. Single crystal diffraction data were obtained using a Bruker APEX-II QUAZAR single crystal diffractometer. PXRD patterns were obtained using a Haoyuan DX-2700BH X-ray power diffractometer. TGA data were obtained using an SDT Q600 thermal analyzer. Gas adsorption measurements were performed with ASAP 2020 V4.02 (V4.02 H). Breakthrough experiments were performed on a BSD-MAB instrument coupled with a gas BSD-mass mass spectrometry (TCD-Thermal Conductivity Detector, detection limit 1 ppm) from Beishide Co, Ltd.

## Adsorption/desorption experiments

ASAP 2020 V4.02 (V4.02 H) was used for both activation and testing prior to gas adsorption. Fresh **TNU-DPA-1** samples were subjected to reagent exchange with anhydrous methanol for 3 days, followed by vacuum drying at 353 K for 10 hours to remove solvent molecules from the material pores. The activated samples were subjected to gas adsorption in liquid nitrogen, ice-water bath and water bath, respectively. N<sub>2</sub> adsorption isotherms at 77 K and C<sub>3</sub>H<sub>4</sub>, C<sub>3</sub>H<sub>6</sub> adsorption isotherms at 273 K and 298 K were collected.

## Column breakthrough experiments

Dynamic breakthrough experiments of C<sub>3</sub>H<sub>4</sub>/C<sub>3</sub>H<sub>6</sub> (v/v,1/99) were carried out on a dynamic gas breakthrough apparatus, in which a gas chromatography (GC) detector was used to monitor the gas flow at the outlet of the packed column. Before the start of the breakthrough experiments, the **TNU-DPA-1** samples need to be packed tightly into a stainless-steel packed column of 180 mm length and 3 mm inner diameter. Afterwards, it was activated for 10 hours under He gas flow and 353 K. Then a gas mixture of C<sub>3</sub>H<sub>4</sub>/C<sub>3</sub>H<sub>6</sub> was passed at the corresponding flow rate. The flow rates of the

gases used can all be regulated with a mass flow controller. For breakthrough cycling experiments, samples need to be desorbed for 30 min under activated conditions to achieve material regeneration.

## Computational details

The binding sites for C<sub>3</sub>H<sub>6</sub> and C<sub>3</sub>H<sub>4</sub> in **TNU-DPA-1** were determined through classical molecular simulations. The single X-ray crystallographic structures were subject to geometry optimization through the CASTEP module implemented with the Materials Studio <sup>[1]</sup> program, using density functional theory (DFT) using the generalized gradient approximation (GGA) with the Perdew-Burke-Ernzerhof (PBE) functional and the double numerical plus d-functions (DNP) basis set. The energy, force, and displacement convergence criteria were set as  $1 \times 10^{-5}$  Ha,  $2 \times 10^{-3}$  Ha/Å and  $5 \times 10^{-3}$  Å, respectively. The calculated electrostatic potential for **TNU-DPA-1** was mapped onto the Connolly surface with a probe radius of 1.0 Å. Simulated annealing (SA) calculations <sup>[2]</sup> were performed for a single molecule of C<sub>3</sub>H<sub>6</sub> and C<sub>3</sub>H<sub>4</sub> through a canonical Monte Carlo (NVT) process, and all MOF atoms were kept fixed at their positions throughout the simulations. The initial configurations were further optimized to ensure a more efficient energy landscape scanning for every MOF- C<sub>x</sub>H<sub>x</sub> complex, and the optimized configuration having the lowest energy was used as the global minimum for the subsequent analysis and calculation. The static binding energy (at T= 0 K) was then calculated:  $\Delta E = E_{\text{MOF}} + E_{\text{gas}} - E_{\text{MOF+gas}}$ .

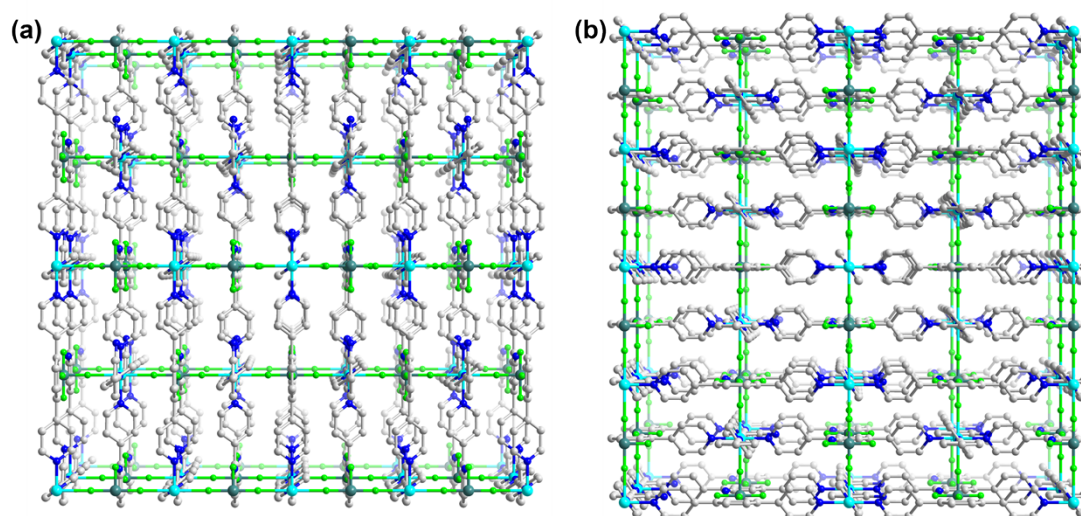

**Figure S1.** Stacking diagram of the TNU-DPA-1 crystal structure in the (a) a-axis and (b) b-axis directions.

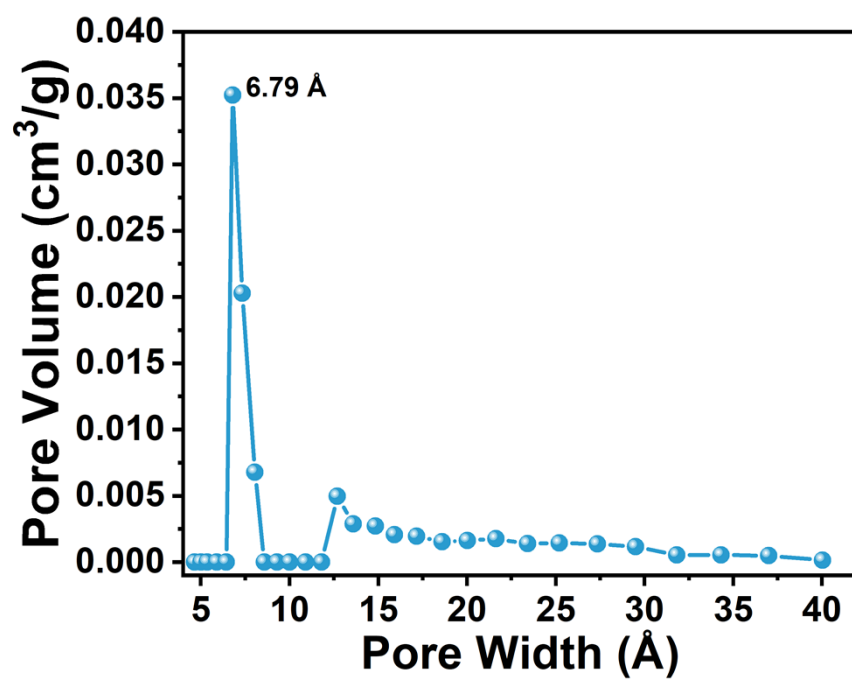

**Figure S2.** Pore size distribution of TNU-DPA-1.

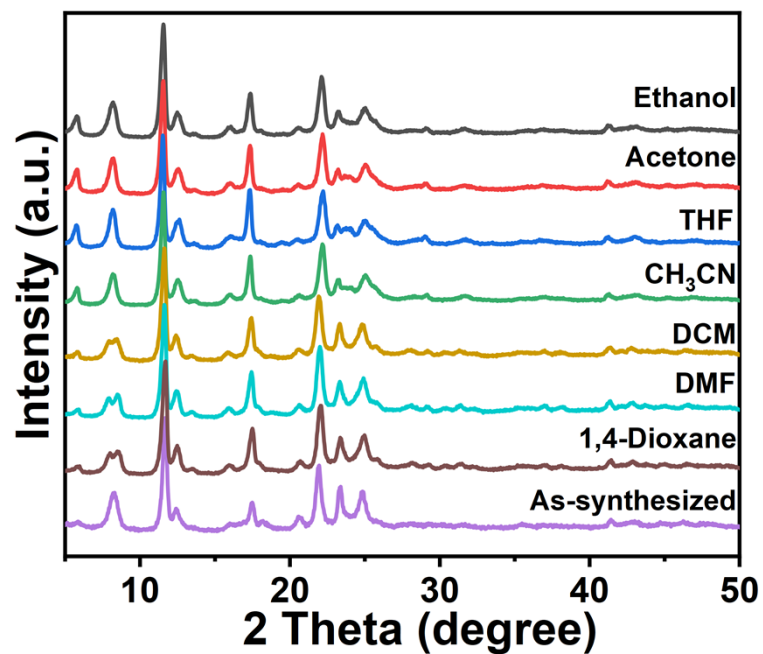

**Figure S3.** PXRD patterns of TNU-DPA-1 samples after immersion in different solvents for 24 hours.

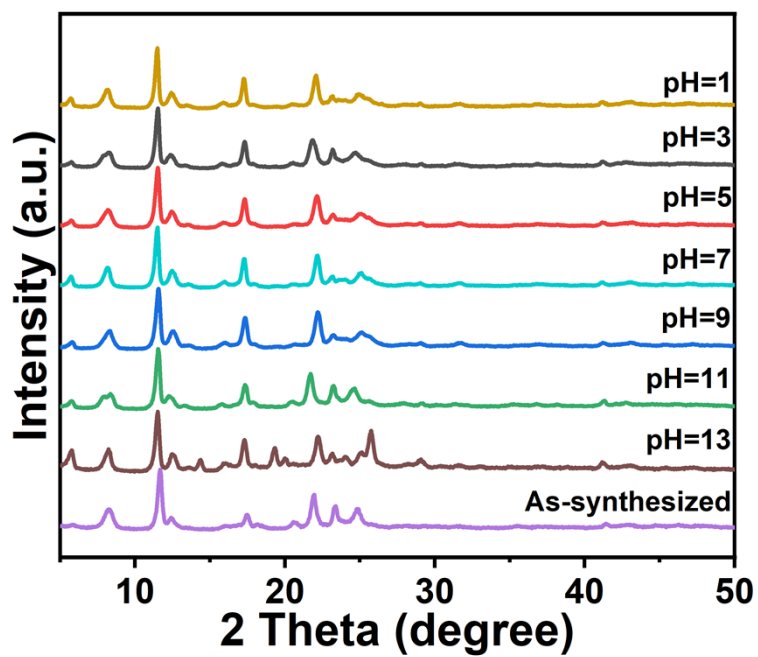

**Figure S4.** PXRD patterns of TNU-DPA-1 samples after immersion in aqueous solutions of different pH values for 24 hours.

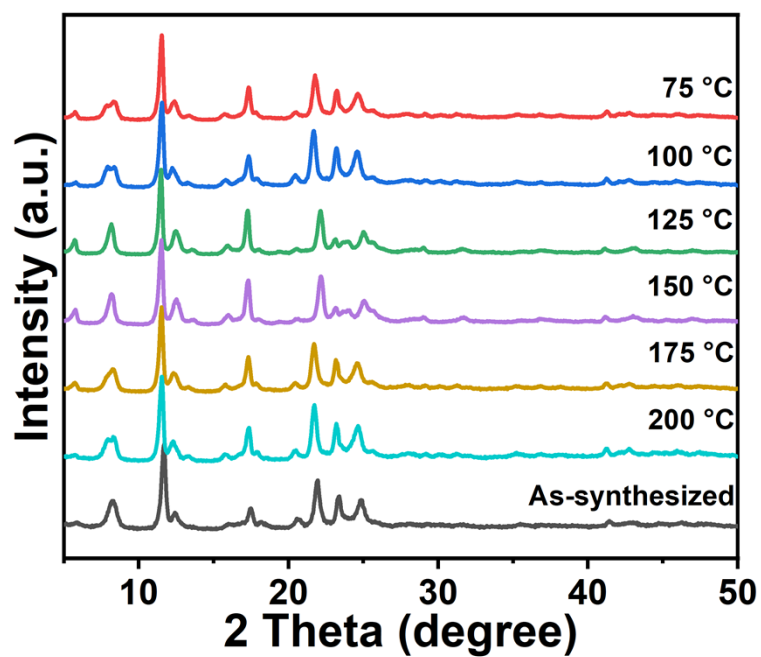

**Figure S5.** Variable temperature PXRD patterns of TNU-DPA-1 samples.

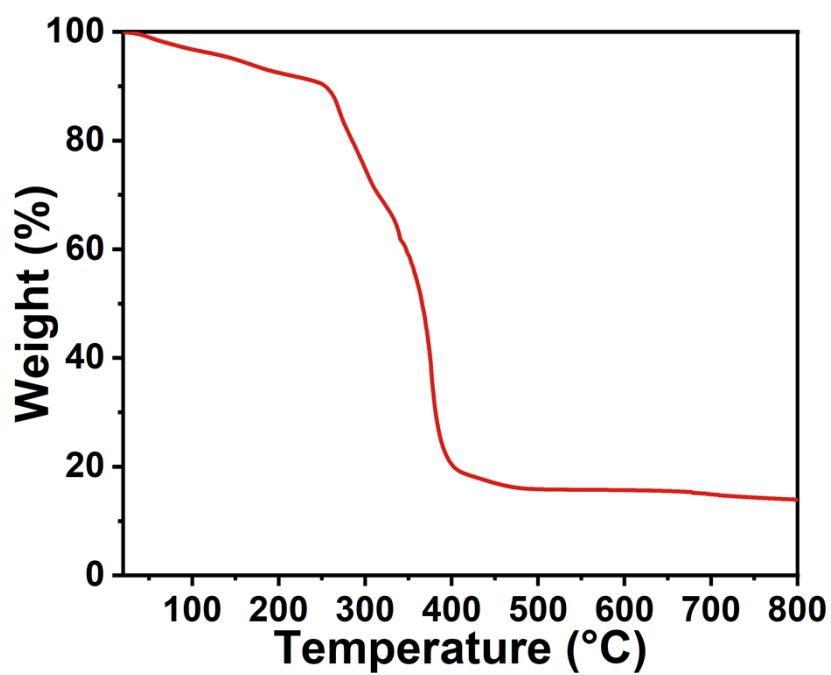

**Figure S6.** Thermogravimetric analysis of TNU-DPA-1 under nitrogen atmosphere.

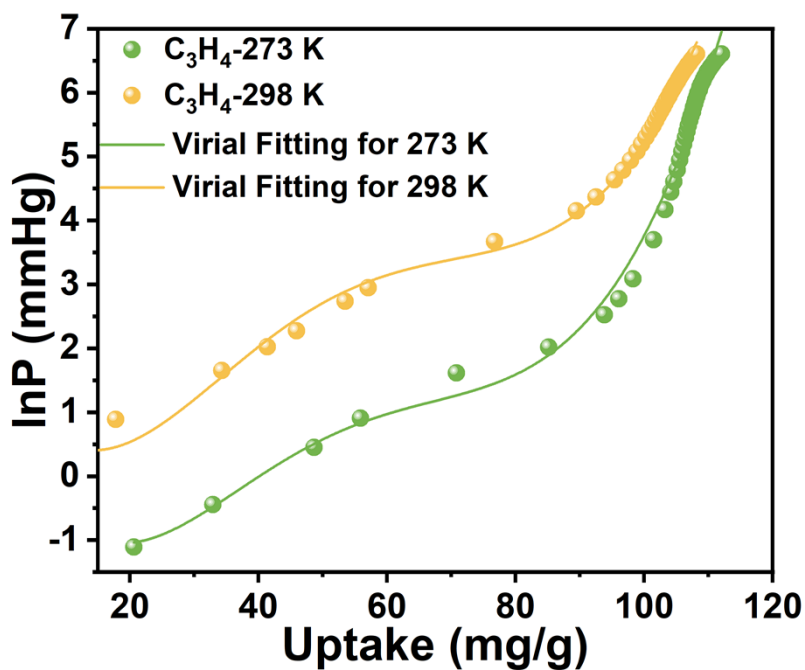

**Figure S7.** Virial fitting of  $C_3H_4$  adsorption isotherms for TNU-DPA-1 at 273 K and 298 K.

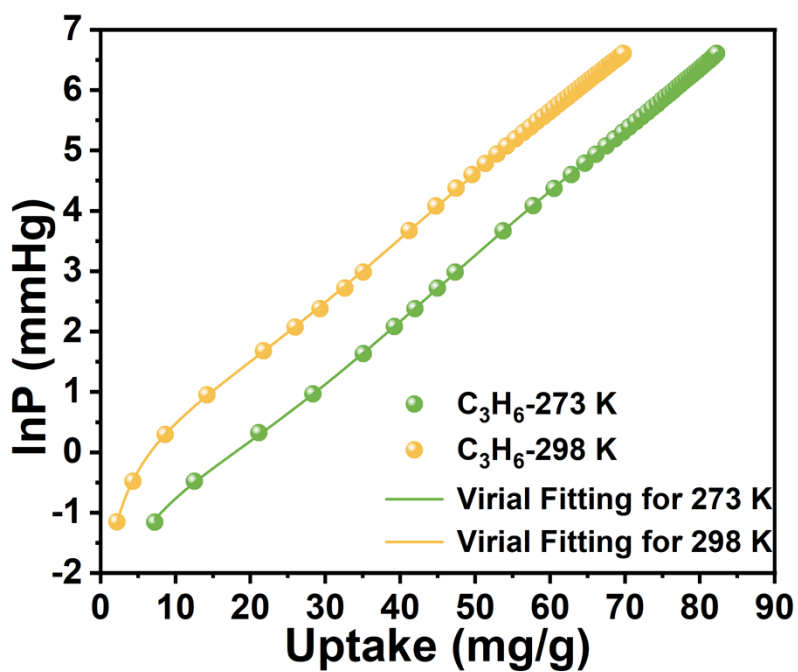

**Figure S8.** Virial fitting of  $C_3H_6$  adsorption isotherms for TNU-DPA-1 at 273 K and 298 K.

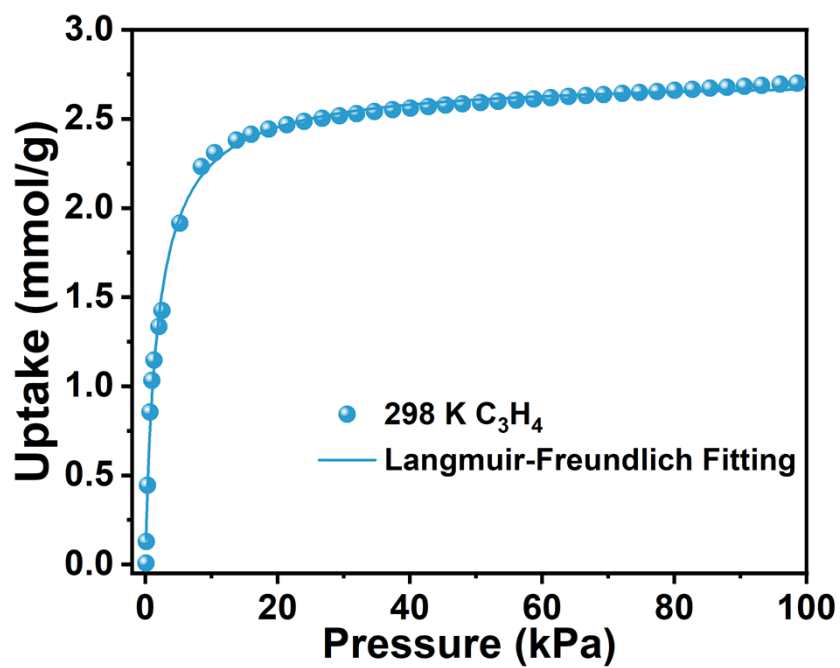

Figure S9. Langmuir-Freundlich fitting of  $C_3H_4$  at 298 K.

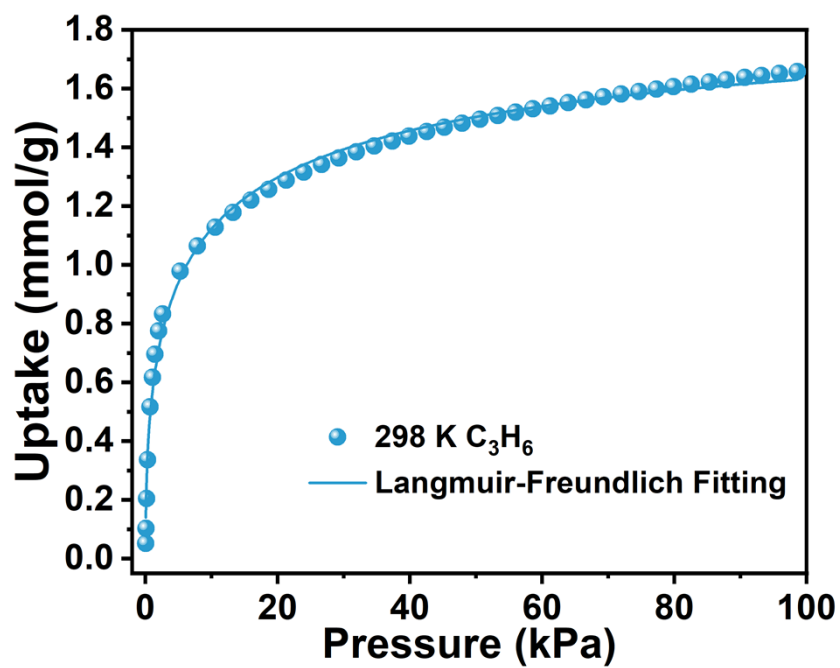

Figure S10. Langmuir-Freundlich fitting of  $C_3H_6$  at 298 K.



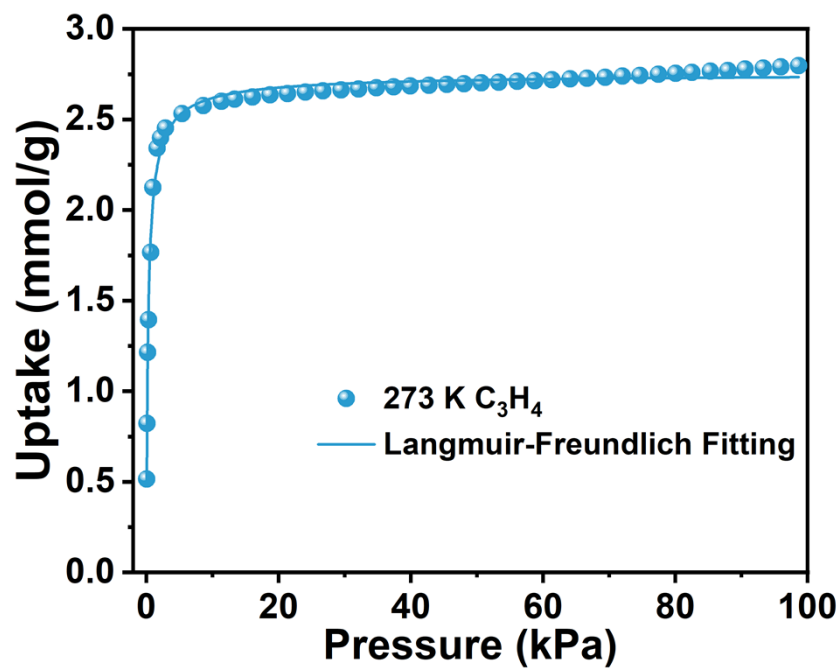

Figure S11. Langmuir-Freundlich fitting of  $C_3H_4$  at 273 K.

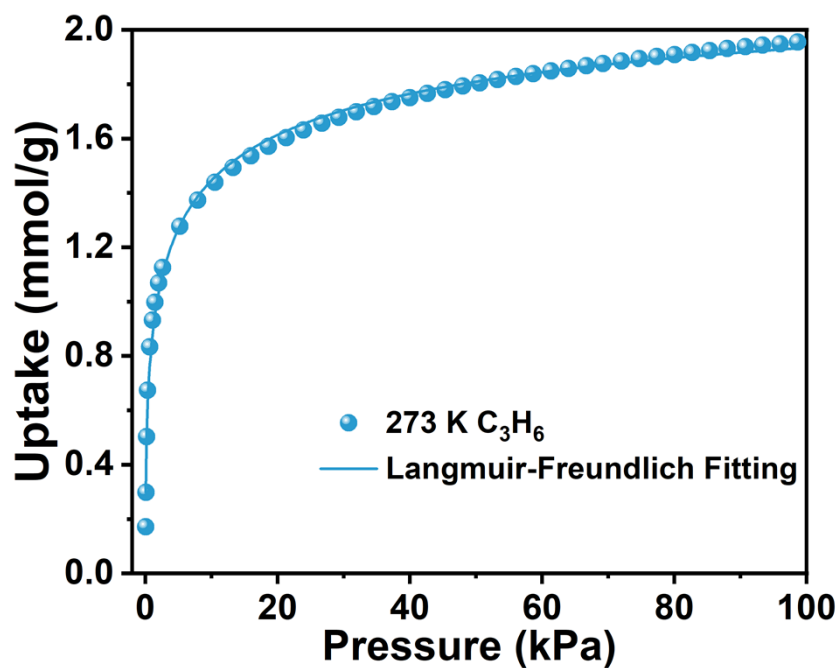

Figure S12. Langmuir-Freundlich fitting of  $C_3H_6$  at 273 K.

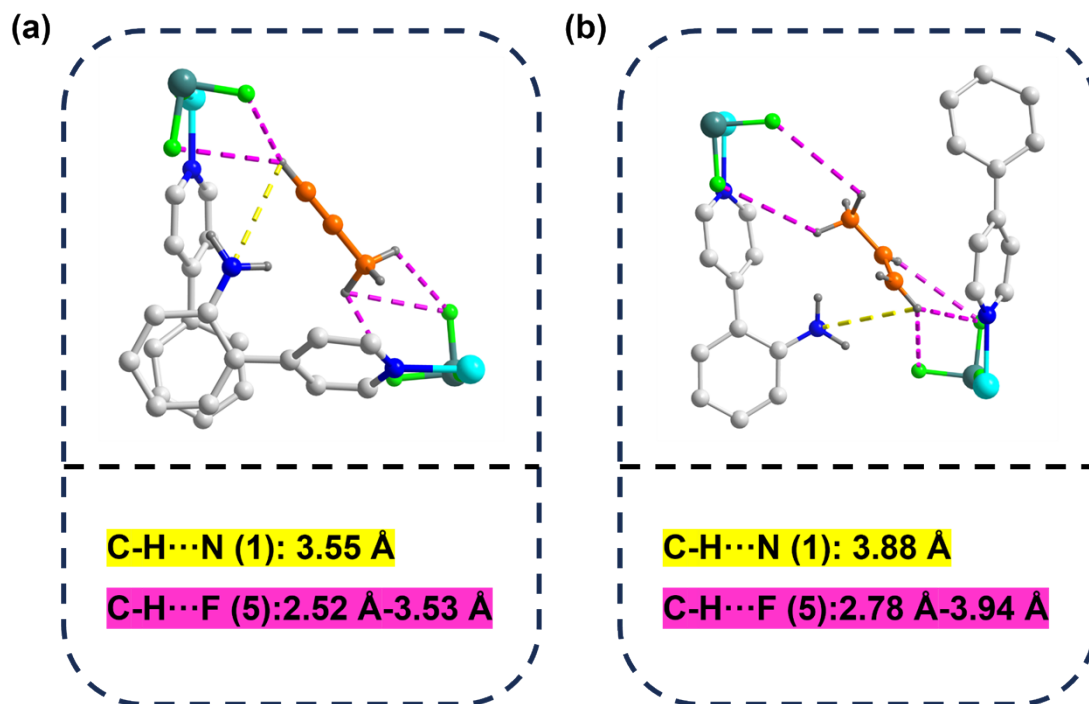

**Figure S13.** DFT-calculated interaction sites of TNU-DPA-1 with the gas molecules (a)  $C_3H_4$  and (b)  $C_3H_6$ .

**Table S1.** Crystal data and structure refinement for **TNU-DPA-1**

| Complex                                                                     | TNU-DPA-1                                                          |
|-----------------------------------------------------------------------------|--------------------------------------------------------------------|
| formula                                                                     | C <sub>32</sub> H <sub>12</sub> CuF <sub>6</sub> N <sub>8</sub> Si |
| CCDC                                                                        | 2493666                                                            |
| T (K)                                                                       | 222                                                                |
| crystal system                                                              | tetragonal                                                         |
| space group                                                                 | I4/mmm                                                             |
| <i>a</i> (Å)                                                                | 15.391                                                             |
| <i>b</i> (Å)                                                                | 15.391                                                             |
| <i>c</i> (Å)                                                                | 8.068                                                              |
| <i>α</i> (deg)                                                              | 90                                                                 |
| <i>β</i> (deg)                                                              | 90                                                                 |
| <i>γ</i> (deg)                                                              | 90                                                                 |
| <i>V</i> (Å <sup>3</sup> )                                                  | 1911.1                                                             |
| <i>Z</i>                                                                    | 16                                                                 |
| <i>D<sub>c</sub></i> (g/cm <sup>3</sup> )                                   | 1.255                                                              |
| <i>R</i> <sub>int</sub>                                                     | 0.1177                                                             |
| F(000)                                                                      | 730                                                                |
| Goof                                                                        | 1.211                                                              |
| <i>R</i> <sub>1</sub> , <i>wR</i> ( <i>I</i> > 2σ( <i>I</i> )) <sup>a</sup> | 0.0644, 0.1868                                                     |
| <i>R</i> <sub>1</sub> , <i>wR</i> (all data) <sup>b</sup>                   | 0.0665, 0.1888                                                     |

<sup>a</sup> $R = \sum ||F_o| - |F_c|| / \sum |F_o|$ , <sup>b</sup> $wR = |\sum w(F_o - F_c)^2 / \sum w(F_o^2)|^{1/2}$

**Table S2.** Comparison of the C<sub>3</sub>H<sub>4</sub>/C<sub>3</sub>H<sub>6</sub> separation properties of TNU-DPA-1 and some superior MOF materials at 298 K and 100 kPa.

|                  | C <sub>3</sub> H <sub>4</sub> uptake | C <sub>3</sub> H <sub>6</sub> uptake | C <sub>3</sub> H <sub>4</sub> /C <sub>3</sub> H <sub>6</sub> | Selectivity                                                  | C <sub>3</sub> H <sub>6</sub> |
|------------------|--------------------------------------|--------------------------------------|--------------------------------------------------------------|--------------------------------------------------------------|-------------------------------|
| Sample           | at 100 kPa                           | at 100 kPa                           | adsorption                                                   | C <sub>3</sub> H <sub>4</sub> /C <sub>3</sub> H <sub>6</sub> | Productivity                  |
|                  | (mmol/g)                             | (mmol/g)                             | ratio                                                        | (v/v,1/99)                                                   | (mmol/g)                      |
| ELM-12           | 2.77                                 | 1.43                                 | 1.93                                                         | 84                                                           | 17                            |
| FJI-W1           | 7.09                                 | 6.27                                 | 1.13                                                         | 2.2                                                          | 52.9                          |
| JXNU-6a          | 5.07                                 | 3.57                                 | 1.42                                                         | 3.1                                                          | 8.9                           |
| ZJUT-1           | 2.24                                 | 0.84                                 | 2.67                                                         | 70                                                           | 9.8                           |
| SIFSIX-1-Cu      | 8.63                                 | 5.88                                 | 1.47                                                         | 8.97                                                         | 9.4                           |
| SIFSIX-2-Cu-i    | 3.77                                 | 2.63                                 | 1.43                                                         | 30.58                                                        | 25.9                          |
| SIFSIX-3-Ni      | 2.85                                 | 2.72                                 | 1.05                                                         | 242.06                                                       | 20.5                          |
| ZIF-8            | 6.27                                 | 4.07                                 | 1.54                                                         | 1.9                                                          | 1.3                           |
| Cu-BTC           | 10.47                                | 8.33                                 | 1.26                                                         | 3.2                                                          | 6.3                           |
| UIO-66           | 10.23                                | 3.33                                 | 3.07                                                         | 15                                                           | 0.9                           |
| Co-MOF-74        | 7.47                                 | 5.95                                 | 1.26                                                         | -                                                            | 7.1                           |
| Mg-MOF-74        | 9.40                                 | 6.49                                 | 1.45                                                         | -                                                            | 5.4                           |
| <b>This work</b> | <b>2.70</b>                          | <b>1.65</b>                          | <b>1.64</b>                                                  | <b>10.9</b>                                                  | <b>19.6</b>                   |

**Table S3.** Comparison of **TNU-DPA-1** with fluorinated MOF materials possessing similar structures.

| Sample         | Gas mixtures                                                 | Uptake (cm <sup>3</sup> g <sup>-1</sup> ) | Q <sub>st</sub> (kJ mol <sup>-1</sup> ) | IAST Selectivity |
|----------------|--------------------------------------------------------------|-------------------------------------------|-----------------------------------------|------------------|
| TNU-DPA-1      | C <sub>3</sub> H <sub>4</sub> /C <sub>3</sub> H <sub>6</sub> | 60.49/37.14                               | 42.5/31.3                               | 10.9             |
| SIFSIX-1-Cu    | C <sub>3</sub> H <sub>4</sub> /C <sub>3</sub> H <sub>6</sub> | 193.31/131.71                             | 37/27                                   | 8.97             |
| SIFSIX-2-Cu-i  | C <sub>3</sub> H <sub>4</sub> /C <sub>3</sub> H <sub>6</sub> | 84.45/58.91                               | 45/37                                   | 30.58            |
| SIFSIX-3-Ni    | C <sub>3</sub> H <sub>4</sub> /C <sub>3</sub> H <sub>6</sub> | 63.84/60.93                               | 68/47                                   | 242.06           |
|                | C <sub>2</sub> H <sub>2</sub> /CO <sub>2</sub>               | 73.92/60.48                               | 36.7/50.9                               | 7.7              |
| SIFSIX-14-Cu-i | C <sub>3</sub> H <sub>4</sub> /C <sub>3</sub> H <sub>6</sub> | 80.42/35.62                               | 51/41                                   | 112.86           |
| GeFSIX-14-Cu-i | C <sub>3</sub> H <sub>4</sub> /C <sub>3</sub> H <sub>6</sub> | 75.26/33.6                                | -                                       | 306.12           |
| TIFSIX-14-Cu-i | C <sub>3</sub> H <sub>4</sub> /C <sub>3</sub> H <sub>6</sub> | 86.46/31.36                               | -                                       | 240.14           |
| SIFSIX-3-Zn    | C <sub>3</sub> H <sub>4</sub> /C <sub>3</sub> H <sub>6</sub> | 50.62/40.32                               | -                                       | 115              |
| ZU-16-Co       | C <sub>3</sub> H <sub>4</sub> /C <sub>3</sub> H <sub>6</sub> | 59.36/47.04                               | -                                       | 248              |
| ZJUT-1         | C <sub>3</sub> H <sub>4</sub> /C <sub>3</sub> H <sub>6</sub> | 50.18/18.82                               | 33.6/-                                  | 70               |
|                | C <sub>2</sub> H <sub>2</sub> /CO <sub>2</sub>               | 73.92/51.52                               | 44.2/40.2                               | 11.7             |
| ZU-62          | C <sub>3</sub> H <sub>4</sub> /C <sub>3</sub> H <sub>6</sub> | 81.31/59.81                               | 71/52                                   | 46.31            |
| TIFSIX-4-Cu-i  | C <sub>2</sub> H <sub>2</sub> /C <sub>2</sub> H <sub>4</sub> | 96.32/33.61                               | 40.8/29.4                               | 11               |
| USTA-121       | C <sub>2</sub> H <sub>2</sub> /CO <sub>2</sub>               | 71.3/36.4                                 | -                                       | -                |
| BSF-3          | C <sub>2</sub> H <sub>2</sub> /C <sub>2</sub> H <sub>4</sub> | 80.42/53.09                               | 42.7/28.1                               | 8.1              |

## References

- [1] Materials Studio v7.0, Biovia Software Inc., S.D., CA 92121, USA.  
[2] Kirkpatrick, S.; Gelatt, C. D.; Vecchi, M. P., Optimization by Simulated Annealing. Science 1983, 220, 671.
